# Supplementary material for: Matrix Metalloproteinase 9/microRNA-145 Ratio: Bridging Genomic and Immunological Variabilities in Thyroid Cancer
Source: MDPI journal article supplement (doi:10.3390/biomedicines11112953), 2023-11-01
Supplement: s1 [file s1]

**Supplementary Table S1.** Antibodies used in immunofluorescence analysis.

| Primary antibody | Species    | Company    | Catalog# | Dilution | Secondary antibody                   |
|------------------|------------|------------|----------|----------|--------------------------------------|
| MMP9             | Goat       | R&D        | AF911    | 1:100    | Alexa Fluor 488<br>Donkey anti-Goat  |
| CD45             | Mouse IgG1 | Abcam      | Ab781    | 1:50     | Alexa Fluor 555<br>Donkey anti-mouse |
| DAPI             |            | Invitrogen | D1306    | 1:20,000 |                                      |
